# Supplementary material for: Exploration of Novel Xanthine Oxidase Inhibitors Based on 1,6-Dihydropyrimidine-5-Carboxylic Acids by an Integrated in Silico Study
Source: MDPI journal article supplement (doi:10.3390/ijms22158122), 2021-07-29
Supplement: s1 [file s1]

## *Supporting Information*

# **Exploration of Novel Xanthine Oxidase Inhibitors Based on 1,6-Dihydropyrimidine-5-Carboxylic Acids by an Integrated in Silico Study**

Na Zhai<sup>1</sup>, Chenchen Wang<sup>1</sup>, Fengshou Wu<sup>1</sup>, Liwei Xiong<sup>1,2,\*</sup>, Xiaogang Luo<sup>1,3</sup>,

Xiulian Ju<sup>1</sup>, Genyan Liu<sup>1,\*</sup>

<sup>a</sup>*Hubei Key Laboratory of Novel Reactor and Green Chemical Technology, School of Chemical Engineering and Pharmacy, Wuhan Institute of Technology, Wuhan 430205, China*

<sup>b</sup>*Hubei Key Laboratory of Plasma Chemistry and Advanced Materials, Wuhan Institute of Technology, Wuhan 430205, China*

<sup>c</sup>*School of Materials Science and Engineering, Zhengzhou University, No.100 Science Avenue, Zhengzhou 450001, China*

<sup>\*</sup> *Correspondence: zhily2000@126.com (L.X.); liugenyan@yahoo.com (G.L.)*

**Table S1.** Chemical structures of the used non-purine XOIs with their actual pIC<sub>50</sub> values and docking scores.

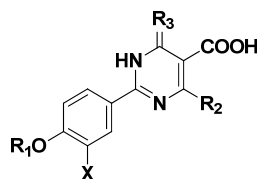

Compounds 01-26: X = 1H-tetrazol-1-yl  
Compounds 27-46: X = CN

| No. | R <sub>1</sub>             | R <sub>2</sub> | R <sub>3</sub> | IC <sub>50</sub> (μM) | pIC <sub>50</sub> | Docking score |
|-----|----------------------------|----------------|----------------|-----------------------|-------------------|---------------|
| 01  | methyl                     | H              | O              | 0.0920                | 7.0362            | 8.98          |
| 02  | <i>iso</i> -propyl         | H              | O              | 0.0737                | 7.1325            | 8.94          |
| 03  | <i>iso</i> -butyl          | H              | O              | 0.0644                | 7.1911            | 9.44          |
| 04  | <i>iso</i> -pentyl         | H              | O              | 0.0541                | 7.2668            | 9.38          |
| 05  | allyl                      | H              | O              | 0.0437                | 7.3595            | 9.55          |
| 06  | <i>iso</i> -butenyl        | H              | O              | 0.0569                | 7.2449            | 9.46          |
| 07  | <i>iso</i> -pentenyl       | H              | O              | 0.0692                | 7.1599            | 9.21          |
| 08  | propinyl                   | H              | O              | 0.0500                | 7.301             | 9.47          |
| 09  | methylene cyclopropane     | H              | O              | 0.0461                | 7.3363            | 9.73          |
| 10  | cyclopentyl                | H              | O              | 0.0585                | 7.2328            | 9.51          |
| 11  | methylene cyclohexane      | H              | O              | 0.0683                | 7.1656            | 9.46          |
| 12  | benzyl                     | H              | O              | 0.0945                | 7.0246            | 8.97          |
| 13  | <i>p</i> -methylbenzyl     | H              | O              | 0.0894                | 7.0487            | 9.38          |
| 14  | <i>p</i> -tert-butylbenzyl | H              | O              | 0.1490                | 6.8268            | 9.12          |
| 15  | <i>p</i> -methoxybenzyl    | H              | O              | 0.0507                | 7.295             | 9.61          |
| 16  | <i>p</i> -fluorobenzyl     | H              | O              | 0.0531                | 7.2749            | 9.53          |
| 17  | <i>p</i> -chlorobenzyl     | H              | O              | 0.0691                | 7.1605            | 9.35          |
| 18  | <i>p</i> -bromobenzyl      | H              | O              | 0.0552                | 7.2581            | 9.46          |
| 19  | <i>m</i> -methoxybenzyl    | H              | O              | 0.0516                | 7.2874            | 9.46          |
| 20  | <i>m</i> -fluorobenzyl     | H              | O              | 0.0477                | 7.3215            | 9.76          |
| 21  | <i>m</i> -chlorobenzyl     | H              | O              | 0.0288                | 7.5406            | 10.63         |
| 22  | <i>m</i> -bromobenzyl      | H              | O              | 0.0450                | 7.3468            | 9.67          |
| 23  | <i>o</i> -chlorobenzyl     | H              | O              | 0.0917                | 7.0376            | 9.10          |
| 24  | 2,5-dichlorobenzyl         | H              | O              | 0.0639                | 7.1945            | 9.34          |
| 25  | 2,4-dichlorobenzyl         | H              | O              | 0.0838                | 7.0768            | 9.37          |
| 26  | hydrogen                   | H              | O              | 0.6290                | 6.2013            | 7.85          |
| 27  | <i>iso</i> -propyl         | H              | O              | 0.0916                | 7.0381            | 9.02          |
| 28  | <i>iso</i> -butyl          | H              | O              | 0.0609                | 7.2154            | 9.55          |
| 29  | <i>iso</i> -pentyl         | H              | O              | 0.0250                | 7.6021            | 10.51         |
| 30  | allyl                      | H              | O              | 0.0811                | 7.091             | 9.22          |
| 31  | <i>iso</i> -butenyl        | H              | O              | 0.0336                | 7.4737            | 9.91          |
| 32  | <i>iso</i> -pentenyl       | H              | O              | 0.0388                | 7.4112            | 9.68          |
| 33  | benzyl                     | H              | O              | 0.0387                | 7.4123            | 9.78          |
| 34  | <i>p</i> -fluorobenzyl     | H              | O              | 0.0382                | 7.4179            | 9.75          |
| 35  | <i>p</i> -chlorobenzyl     | H              | O              | 0.0499                | 7.3019            | 9.58          |
| 36  | <i>p</i> -bromobenzyl      | H              | O              | 0.0298                | 7.5258            | 10.51         |
| 37  | <i>p</i> -tert-butylbenzyl | H              | O              | 0.1970                | 6.7055            | 8.35          |
| 38  | <i>p</i> -methylbenzyl     | H              | O              | 0.0354                | 7.451             | 9.99          |

|    |                        |                 |    |        |        |       |
|----|------------------------|-----------------|----|--------|--------|-------|
| 39 | <i>iso</i> -pentyl     | CH <sub>3</sub> | O  | 0.5400 | 6.2676 | 8.40  |
| 40 | <i>iso</i> -butenyl    | CH <sub>3</sub> | O  | 0.5677 | 6.2459 | 8.36  |
| 41 | <i>p</i> -bromobenzyl  | CH <sub>3</sub> | O  | 0.1854 | 6.7319 | 9.01  |
| 42 | <i>p</i> -methylbenzyl | CH <sub>3</sub> | O  | 0.1590 | 6.7986 | 8.81  |
| 43 | <i>iso</i> -pentyl     | H               | NH | 0.0240 | 7.6198 | 10.68 |
| 44 | <i>iso</i> -butenyl    | H               | NH | 0.0181 | 7.7423 | 10.69 |
| 45 | <i>p</i> -bromobenzyl  | H               | NH | 0.0271 | 7.567  | 10.50 |
| 46 | <i>p</i> -methylbenzyl | H               | NH | 0.0339 | 7.4698 | 9.97  |

---

**Table S2.** The statistical results of other pharmacophore models using different compounds.

| No. | SPECIFICITY | N_HITS | FEATS | PARETO | ENERGY | STERICS | HBOND  | MOL_QRY |
|-----|-------------|--------|-------|--------|--------|---------|--------|---------|
| 1   | 4.811       | 11     | 8     | 0      | 10.95  | 2156.90 | 562.20 | 95.77   |
| 2   | 4.803       | 12     | 8     | 0      | 11.80  | 2163.20 | 558.40 | 162.16  |
| 3   | 4.812       | 12     | 8     | 0      | 10.66  | 2143.50 | 562.30 | 87.70   |
| 4   | 5.638       | 11     | 8     | 0      | 10.54  | 2065.30 | 558.50 | 80.09   |
| 5   | 4.829       | 10     | 8     | 0      | 10.12  | 2191.80 | 561.10 | 95.43   |
| 6   | 4.808       | 12     | 8     | 0      | 8.20   | 2003.90 | 526.50 | 84.06   |
| 7   | 4.825       | 10     | 8     | 0      | 9.57   | 1847.80 | 548.20 | 76.72   |
| 8   | 4.824       | 11     | 8     | 0      | 11.54  | 2059.70 | 571.10 | 155.18  |
| 9   | 4.821       | 12     | 8     | 0      | 10.69  | 2267.10 | 584.60 | 78.31   |
| 10  | 4.822       | 11     | 8     | 0      | 24.33  | 2357.60 | 588.20 | 80.63   |

**Table S3.** The ADME prediction results of the non-ideal virtual-screened hits.

| Hit compound        | MW<br>(g/mol) | Fraction<br>Csp <sup>3</sup> | Rotatable<br>bonds | TPSA<br>(Å <sup>2</sup> ) | GI<br>absorption | BBB<br>permeant | CYP1A2<br>inhibitor | CYP2C19<br>inhibitor | CYP2C9<br>inhibitor | CYP2D6<br>inhibitor | CYP3A4<br>inhibitor | Lipinski<br>violations | SA<br>score |
|---------------------|---------------|------------------------------|--------------------|---------------------------|------------------|-----------------|---------------------|----------------------|---------------------|---------------------|---------------------|------------------------|-------------|
| VS01 (ZINC09434063) | 422.61        | 0.6                          | 13                 | 142.1                     | Low              | No              | No                  | Yes                  | Yes                 | Yes                 | Yes                 | 0                      | 3.43        |
| VS02 (ZINC04705438) | 421.52        | 0.27                         | 7                  | 111                       | High             | No              | No                  | Yes                  | Yes                 | No                  | Yes                 | 0                      | 3.97        |
| VS03 (ZINC59016051) | 429.47        | 0.2                          | 9                  | 126.8                     | Low              | No              | No                  | Yes                  | Yes                 | No                  | Yes                 | 0                      | 3.62        |
| VS04 (ZINC63625083) | 427.5         | 0.23                         | 6                  | 103.1                     | High             | No              | No                  | No                   | No                  | No                  | No                  | 0                      | 4.41        |
| VS05 (ZINC89942644) | 318.37        | 0.38                         | 7                  | 103.2                     | High             | No              | No                  | No                   | No                  | No                  | No                  | 0                      | 3.26        |
| VS06 (ZINC89942901) | 370.43        | 0.44                         | 8                  | 149                       | Low              | No              | No                  | No                   | No                  | No                  | No                  | 0                      | 4.02        |
| VS07 (ZINC04927833) | 411.52        | 0.27                         | 11                 | 101.5                     | High             | No              | Yes                 | Yes                  | Yes                 | Yes                 | Yes                 | 0                      | 3.51        |
| VS08 (ZINC95498920) | 347.43        | 0.63                         | 6                  | 50.8                      | High             | Yes             | No                  | No                   | No                  | No                  | No                  | 0                      | 3.75        |
| VS09 (ZINC39932293) | 412.49        | 0.58                         | 10                 | 176.7                     | Low              | No              | No                  | No                   | No                  | No                  | Yes                 | 1                      | 4.7         |
| VS10 (ZINC12537662) | 469.45        | 0.05                         | 9                  | 151.1                     | Low              | No              | No                  | Yes                  | No                  | No                  | No                  | 1                      | 3.6         |
| VS11 (ZINC12741060) | 480.51        | 0.38                         | 11                 | 123.9                     | High             | No              | No                  | No                   | Yes                 | Yes                 | No                  | 0                      | 4.95        |
| VS13 (ZINC24928355) | 295.34        | 0.33                         | 7                  | 127.2                     | High             | No              | Yes                 | No                   | No                  | No                  | Yes                 | 0                      | 2.76        |
| VS14 (ZINC06053573) | 389.36        | 0.28                         | 9                  | 139.6                     | High             | No              | Yes                 | No                   | Yes                 | No                  | No                  | 0                      | 4.22        |
| VS15 (ZINC31176221) | 402.45        | 0.32                         | 5                  | 96.8                      | High             | No              | No                  | Yes                  | Yes                 | No                  | Yes                 | 0                      | 3.72        |
| VS17 (ZINC21991916) | 332.33        | 0.75                         | 12                 | 151.6                     | Low              | No              | No                  | No                   | No                  | No                  | No                  | 0                      | 3.61        |
| VS18 (ZINC09493835) | 463.51        | 0.47                         | 10                 | 191.3                     | Low              | No              | No                  | Yes                  | No                  | No                  | Yes                 | 0                      | 3.73        |
| VS20 (ZINC65506066) | 308.33        | 0.11                         | 5                  | 57.9                      | High             | Yes             | No                  | No                   | No                  | Yes                 | No                  | 0                      | 2.6         |
| VS21 (ZINC09235475) | 426.4         | 0.09                         | 5                  | 120.3                     | High             | No              | No                  | Yes                  | No                  | No                  | No                  | 0                      | 3.46        |
| VS22 (ZINC32785893) | 582.65        | 0.27                         | 12                 | 123.9                     | High             | No              | No                  | No                   | No                  | No                  | No                  | 0                      | 5.15        |
| VS23 (ZINC21580816) | 418.4         | 0.09                         | 8                  | 122.1                     | High             | No              | Yes                 | Yes                  | Yes                 | Yes                 | Yes                 | 0                      | 2.97        |
| VS24 (ZINC63505952) | 498.61        | 0.33                         | 8                  | 71.5                      | High             | No              | No                  | No                   | No                  | Yes                 | Yes                 | 0                      | 5.42        |
| VS25 (ZINC09295542) | 453.81        | 0.1                          | 7                  | 133.8                     | Low              | No              | No                  | Yes                  | No                  | No                  | No                  | 0                      | 3.47        |
| VS27 (ZINC12820565) | 384.44        | 0.19                         | 6                  | 120.4                     | High             | No              | Yes                 | Yes                  | Yes                 | Yes                 | Yes                 | 0                      | 3.17        |
| VS28 (ZINC16362213) | 348.42        | 0.35                         | 9                  | 106.6                     | High             | No              | Yes                 | Yes                  | Yes                 | No                  | Yes                 | 0                      | 2.87        |
| VS29 (ZINC09120119) | 455.55        | 0.27                         | 8                  | 158.5                     | Low              | No              | Yes                 | Yes                  | Yes                 | No                  | Yes                 | 0                      | 4.11        |
| VS30 (ZINC72320942) | 432.56        | 0.42                         | 8                  | 79.9                      | High             | No              | No                  | Yes                  | Yes                 | Yes                 | Yes                 | 0                      | 4.42        |

|                     |        |      |    |       |      |     |     |     |     |    |     |   |      |
|---------------------|--------|------|----|-------|------|-----|-----|-----|-----|----|-----|---|------|
| VS31 (ZINC12547951) | 387.48 | 0.26 | 9  | 111.1 | High | No  | Yes | Yes | Yes | No | Yes | 0 | 3.46 |
| VS32 (ZINC39289590) | 248.3  | 0.5  | 3  | 38.3  | High | Yes | No  | No  | No  | No | No  | 0 | 2.68 |
| VS33 (ZINC73707897) | 398.48 | 0.41 | 10 | 71.6  | High | No  | No  | No  | No  | No | Yes | 0 | 4.03 |
| VS34 (ZINC18190685) | 481.52 | 0.3  | 12 | 186.9 | Low  | No  | No  | No  | No  | No | Yes | 0 | 3.84 |
| VS35 (ZINC89942526) | 369.44 | 0.37 | 9  | 128.2 | High | No  | No  | No  | No  | No | No  | 0 | 3.54 |
| VS36 (ZINC89943165) | 370.47 | 0.5  | 8  | 101.4 | High | No  | No  | No  | No  | No | No  | 0 | 3.77 |
| VS37 (ZINC31167456) | 502.92 | 0.43 | 11 | 173.7 | Low  | No  | No  | No  | No  | No | No  | 1 | 5.28 |

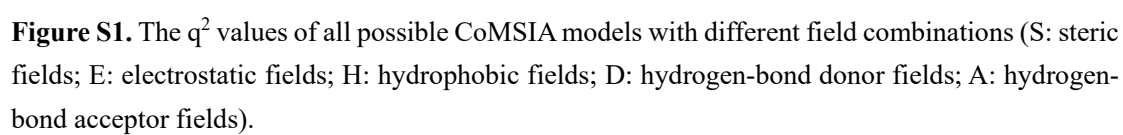

**Figure S1.** The  $q^2$  values of all possible CoMSIA models with different field combinations (S: steric fields; E: electrostatic fields; H: hydrophobic fields; D: hydrogen-bond donor fields; A: hydrogen-bond acceptor fields).

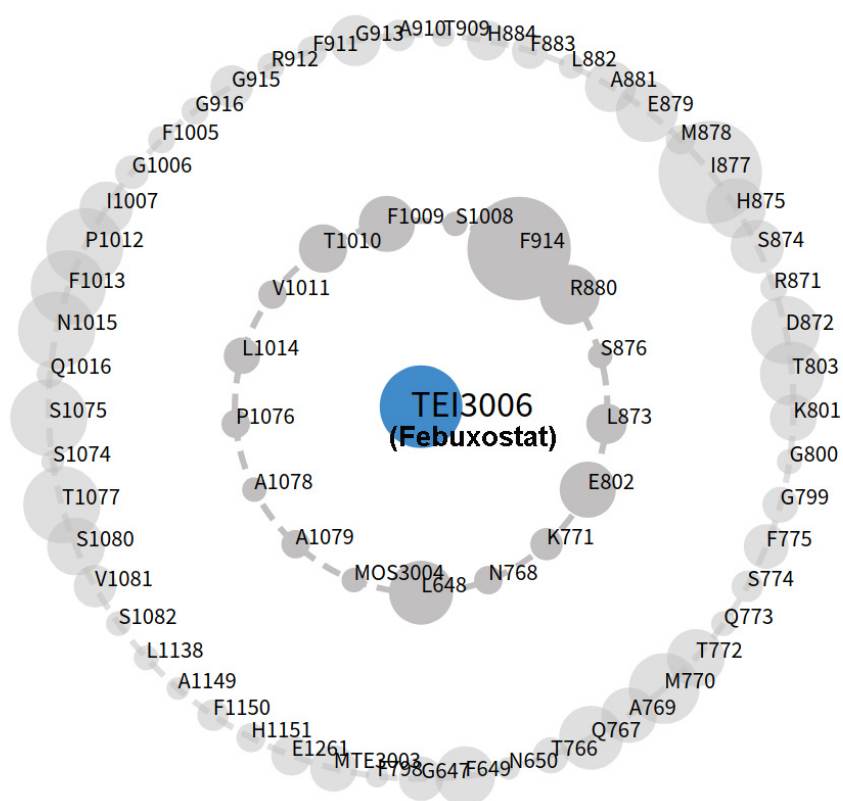

**Figure S2.** The asteroid plot of co-crystal XO structure (PDB ID: 1N5X) with febuxostat (center node).



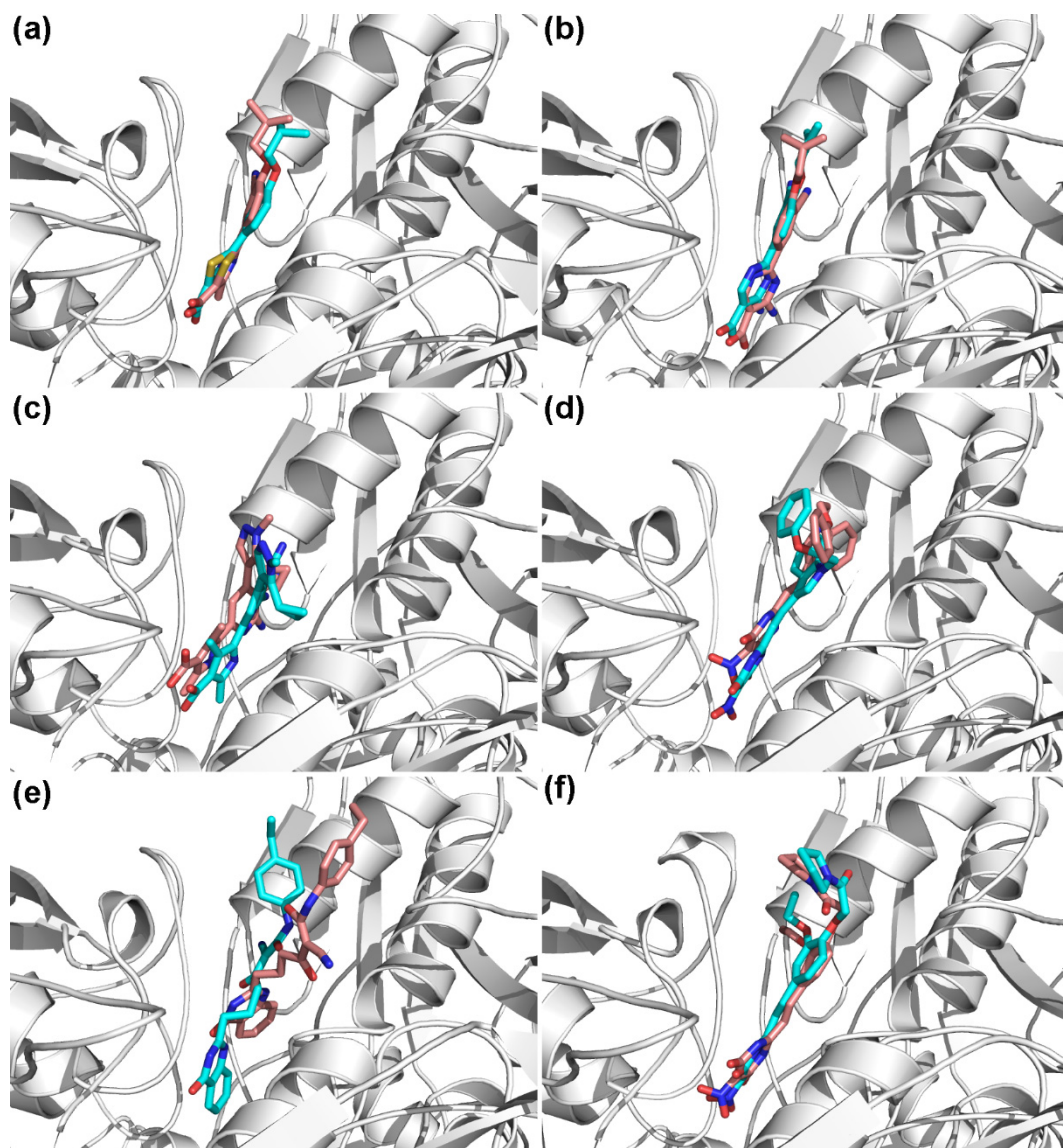

**Figure S3.** The initial (cyan sticks) and final (pink sticks) conformations of compounds febuxostat (a), 44 (b), VS12 (c), VS16 (d), VS19 (e), and VS26 (f) in XO protein during 50 ns MD simulations.

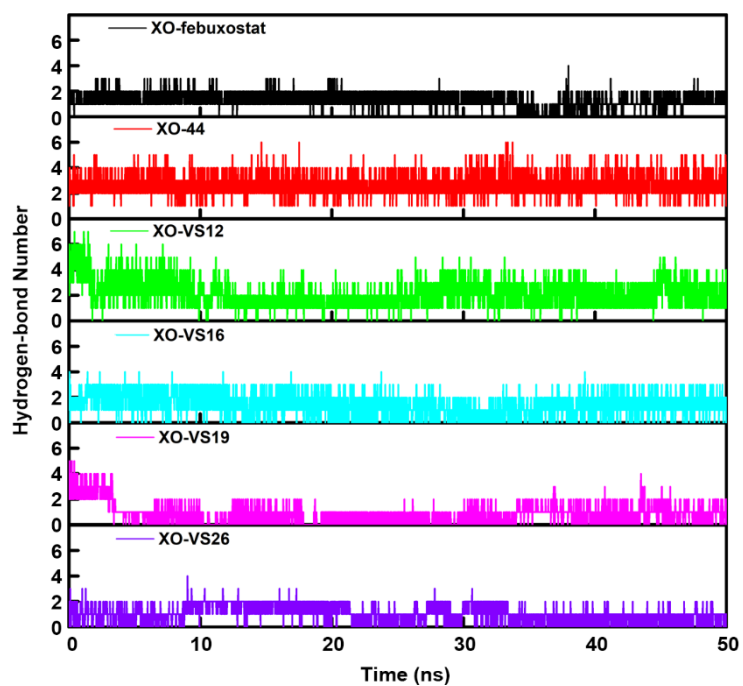

**Figure S4.** The hydrogen-bond numbers between protein and compounds febuxostat (black), **44** (red), **VS12** (green), **VS16** (cyan), **VS19** (magenta), and **VS26** (violet) during 50 ns MD simulations.

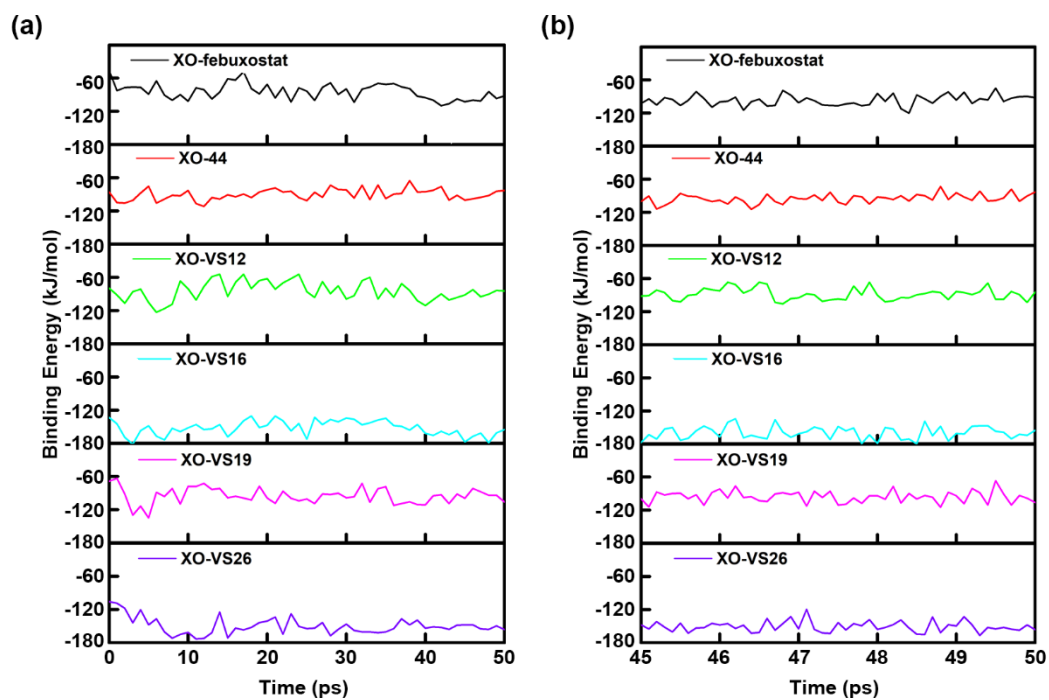

**Figure S5.** Binding energies (kJ/mol) convergence of complexes XO-febuxostat (black), XO-44 (red), XO-VS12 (green), XO-VS16 (cyan), XO-VS19 (magenta), and XO-VS26 (violet) during 50 ns MD simulations (a: the 50 ns trajectory of each complex at an interval of 1 ns; b: the final 5 ns trajectory of each complex at an interval of 100 ps).

|           |      |          |                |           |                  |         |            |
|-----------|------|----------|----------------|-----------|------------------|---------|------------|
|           | 1    | 10       | 20             | 30        | 40               | 50      | 60         |
| XO_bovine | MTAD | LVFFVNG  | KKVVEKNADPETTL | LAYLRRLGL | R                | GTKLGC  | EGGGCGACTV |
| XO_HUMAN  | MTAD | LVFFVNG  | KKVVEKNADPETTL | LAYLRRLGL | S                | GTKLGC  | EGGGCGACTV |
|           | 70   | 80       | 90             | 100       | 110              | 120     | 130        |
| XO_bovine | F    | SANACLAP | I              | T         | LHHVAVTTVEGIGSTK | TRLHPVQ | ERIAKSHGSQ |
| XO_HUMAN  | F    | SANACLAP | I              | S         | LHHVAVTTVEGIGSTK | TRLHPVQ | ERIAKSHGSQ |
|           | 140  | 150      | 160            | 170       | 180              | 190     | 200        |
| XO_bovine | T    | VEEIED   | AFQGNLC        | RCTGYRPI  | LQGFRTFA         | K       | NGCCGG     |
| XO_HUMAN  | T    | VEEIED   | AFQGNLC        | RCTGYRPI  | LQGFRTFA         | R       | GGCCGG     |
|           | 210  | 220      | 230            | 240       | 250              | 260     |            |
| XO_bovine | M    | PLDPTQ   | EPIFFPELLRL    | KD        | V                | P       | KQLRFEG    |
| XO_HUMAN  | T    | PLDPTQ   | EPIFFPELLRL    | KD        | T                | P       | RKQLRFEG   |
|           | 270  | 280      | 290            | 300       | 310              | 320     | 330        |
| XO_bovine | K    | FKNQ     | LFPMT          | ICPAWIPE  | LN               | A       | VEHGP      |
| XO_HUMAN  | K    | FKNQ     | LFPMT          | ICPAWIPE  | LN               | S       | VEHGP      |
|           | 340  | 350      | 360            | 370       | 380              | 390     | 400        |
| XO_bovine | W    | FAGKQ    | VKS            | VASV      | GGNIIT           | ASPI    | SDLNP      |
| XO_HUMAN  | W    | FAGKQ    | VKS            | VASV      | GGNIIT           | ASPI    | SDLNP      |
|           | 410  | 420      | 430            | 440       | 450              | 460     |            |
| XO_bovine | I    | LLSIEI   | PYSRE          | D         | E                | F       | SFAFKQ     |
| XO_HUMAN  | I    | LLSIEI   | PYSRE          | G         | E                | F       | SFAFKQ     |
|           | 470  | 480      | 490            | 500       | 510              | 520     | 530        |
| XO_bovine | T    | QKQLSK   | F              | W         | N                | E       | K          |
| XO_HUMAN  | T    | QKQLSK   | F              | W         | K                | E       | L          |
|           | 540  | 550      | 560            | 570       | 580              | 590     | 600        |
| XO_bovine | G    | KLDPT    | T              | SATLLF    | QKH              | P       | PAN        |
| XO_HUMAN  | G    | KLDPT    | T              | SATLLF    | QKH              | P       | PA         |
|           | 610  | 620      | 630            | 640       | 650              | 660     |            |
| XO_bovine | I    | F        | LRLVT          | STRAHAKI  | SID              | V       | SEA        |
| XO_HUMAN  | I    | S        | LRLVT          | STRAHAKI  | SID              | T       | SEA        |
|           | 670  | 680      | 690            | 700       | 710              | 720     | 730        |
| XO_bovine | V    | VADTPE   | H              | A         | E                | R       | A          |
| XO_HUMAN  | V    | VADTPE   | H              | T         | Q                | R       | A          |
|           | 740  | 750      | 760            | 770       | 780              | 790     | 800        |
| XO_bovine | G    | GQD      | H              | FYLETH    | CTIA             | P       | KGE        |
| XO_HUMAN  | G    | GQD      | H              | FYLETH    | CTIA             | P       | KGE        |
|           | 810  | 820      | 830            | 840       | 850              | 860     | 870        |
| XO_bovine | R    | STLV     | S              | A         | VALAAY           | K       | TG         |
| XO_HUMAN  | R    | STLV     | S              | A         | VALAAY           | K       | TG         |
|           | 880  | 890      | 900            | 910       | 920              | 930     |            |
| XO_bovine | R    | DLS      | H              | SIMER     | ALF              | H       | M          |
| XO_HUMAN  | Q    | DLS      | Q              | SIMER     | ALF              | H       | M          |
|           | 940  | 950      | 960            | 970       | 980              | 990     | 1000       |
| XO_bovine | A    | EEV      | R              | K         | N                | Y       | K          |
| XO_HUMAN  | A    | EEV      | R              | K         | N                | Y       | K          |
|           | 1010 | 1020     | 1030           | 1040      | 1050             | 1060    | 1070       |
| XO_bovine | F    | GISFT    | V              | P         | F                | L       | N          |
| XO_HUMAN  | F    | GISFT    | V              | P         | F                | L       | N          |
|           | 1080 | 1090     | 1100           | 1110      | 1120             | 1130    |            |
| XO_bovine | P    | N        | S              | P         | T                | A       | S          |
| XO_HUMAN  | P    | N        | T              | S         | P                | T       | A          |

|           |                                                                                                            |      |      |      |      |      |      |
|-----------|------------------------------------------------------------------------------------------------------------|------|------|------|------|------|------|
|           | 1140                                                                                                       | 1150 | 1160 | 1170 | 1180 | 1190 | 1200 |
| XO_bovine | GYSFETNSGN <sup>A</sup> FHYF <sup>T</sup> YGVACSEVEIDCLTGDHKNLR <sup>T</sup> DIVMDVGSSLNPAIDIGQVEGAFVQGLGL |      |      |      |      |      |      |
| XO_HUMAN  | GYSFETNSGN <sup>P</sup> FHYF <sup>S</sup> YGVACSEVEIDCLTGDHKNLR <sup>T</sup> DIVMDVGSSLNPAIDIGQVEGAFVQGLGL |      |      |      |      |      |      |

  

|           |                                                                                                                          |      |      |      |      |      |      |
|-----------|--------------------------------------------------------------------------------------------------------------------------|------|------|------|------|------|------|
|           | 1210                                                                                                                     | 1220 | 1230 | 1240 | 1250 | 1260 | 1270 |
| XO_bovine | FTLEELHYSPEGSLHTRGPSTYKIPAFGSIP <sup>T</sup> EFRVSLLRDCPNKKAIYASKAVGEPP <sup>L</sup> FL <sup>G</sup> AS <sup>V</sup> VFF |      |      |      |      |      |      |
| XO_HUMAN  | FTLEELHYSPEGSLHTRGPSTYKIPAFGSIP <sup>T</sup> EFRVSLLRDCPNKKAIYASKAVGEPP <sup>L</sup> FL <sup>A</sup> AS <sup>I</sup> EFF |      |      |      |      |      |      |

  

|           |                                                                                                                               |      |      |      |      |      |
|-----------|-------------------------------------------------------------------------------------------------------------------------------|------|------|------|------|------|
|           | 1280                                                                                                                          | 1290 | 1300 | 1310 | 1320 | 1330 |
| XO_bovine | AIKDAIRAARAQHT <sup>N</sup> NN <sup>T</sup> KELFRLDSPATPEKIRNACVDKFTTLCVTG <sup>A</sup> P <sup>G</sup> NCKPWS <sup>I</sup> RV |      |      |      |      |      |
| XO_HUMAN  | AIKDAIRAARAQHT <sup>G</sup> NN <sup>V</sup> KELFRLDSPATPEKIRNACVDKFTTLCVTG <sup>V</sup> P <sup>E</sup> NCKPWS <sup>V</sup> RV |      |      |      |      |      |

**Figure S6.** The sequence alignment of bovine and human XO enzymes (the key residues for febuxostat binding with XO marked by black frames).

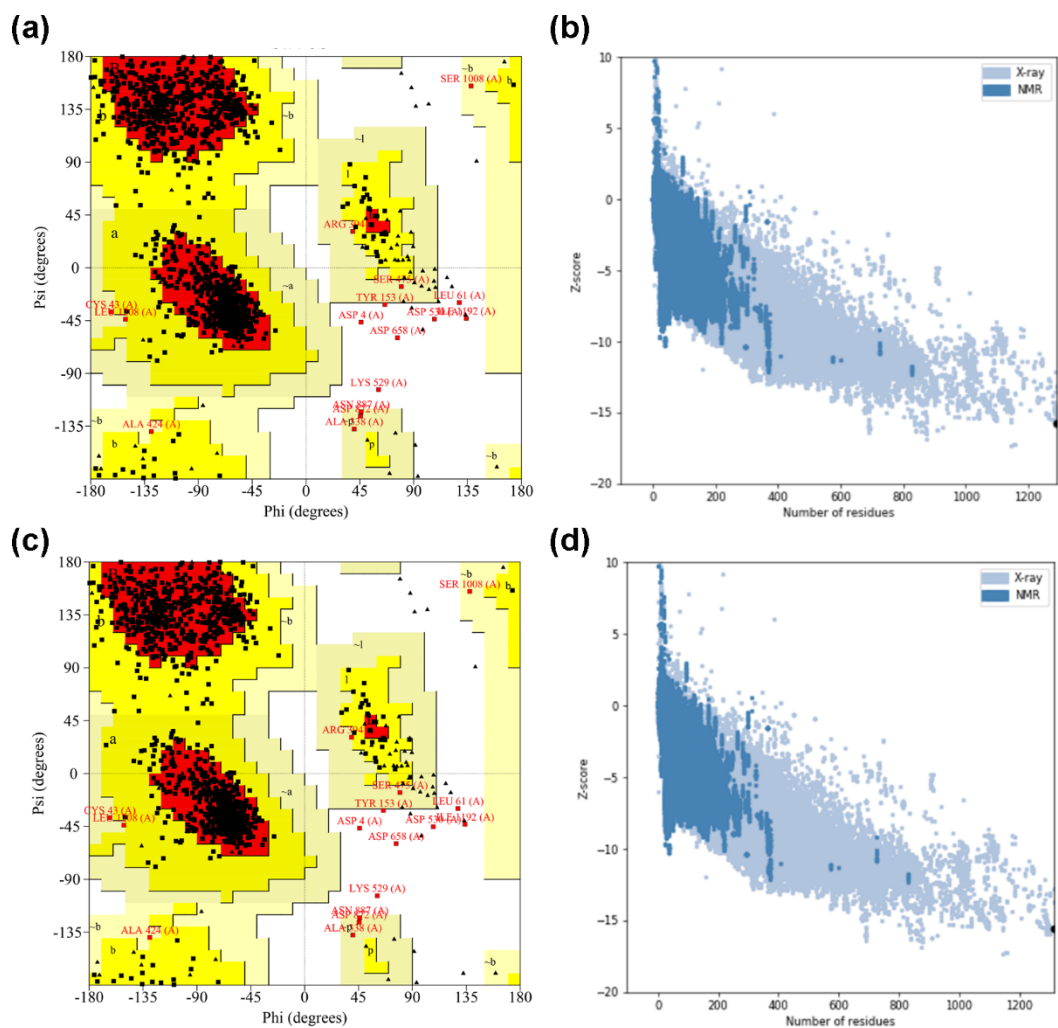

**Figure S7.** Evaluation results of Ramachandran (a, c) and Z-score distribution (b, d) plots of the original (a, b) and repaired (c, d) XO proteins.
